# Supplementary material for: Experiences of patients with multimorbidity with primary care and the association with patient activation: a cross-sectional study in Germany
Source: HighWire-hosted journal article supplement (doi:10.1136/bmjopen-2021-059100), 2022-08-01
Supplement: bmjopen-2021-059100supp001_data_supplement.pdf [file bmjopen-2021-059100supp001_data_supplement.pdf]

Supplemental material

Appendix to: **Experiences of patients with multimorbidity with primary care and the association with patient activation: a cross-sectional study in Germany**

**Analysis – Diagrams for the Linear model**

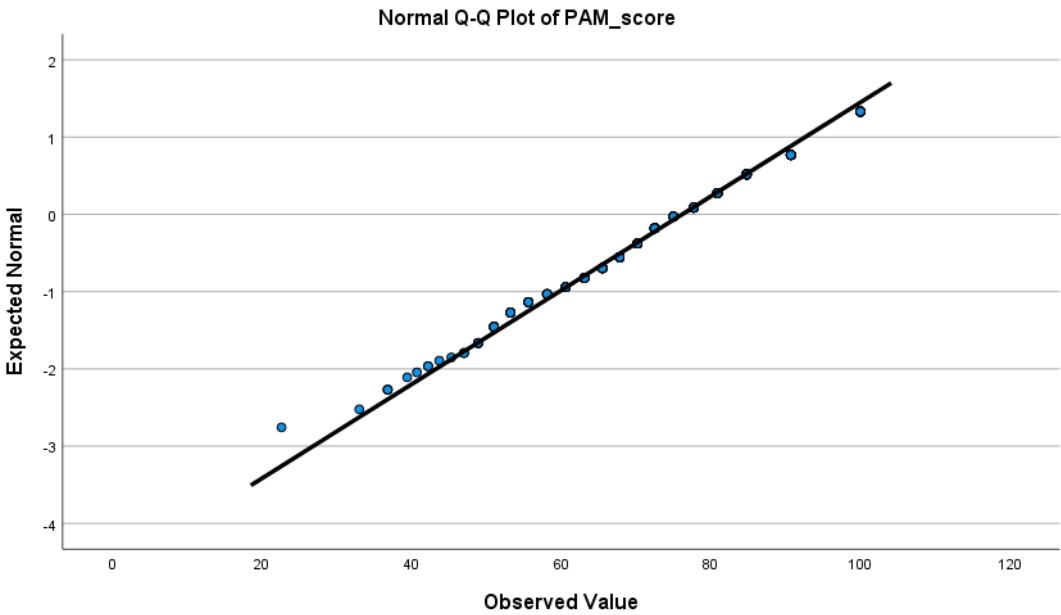

Residuen:

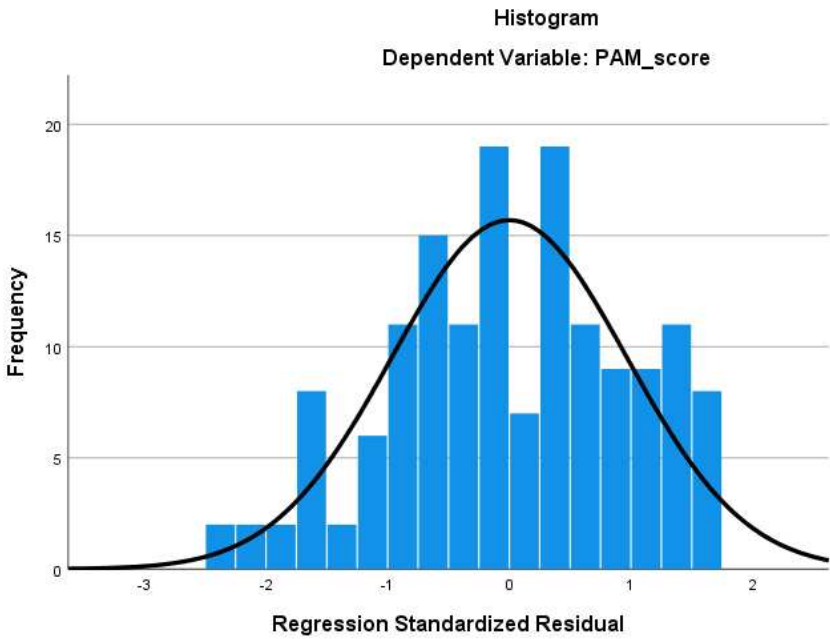

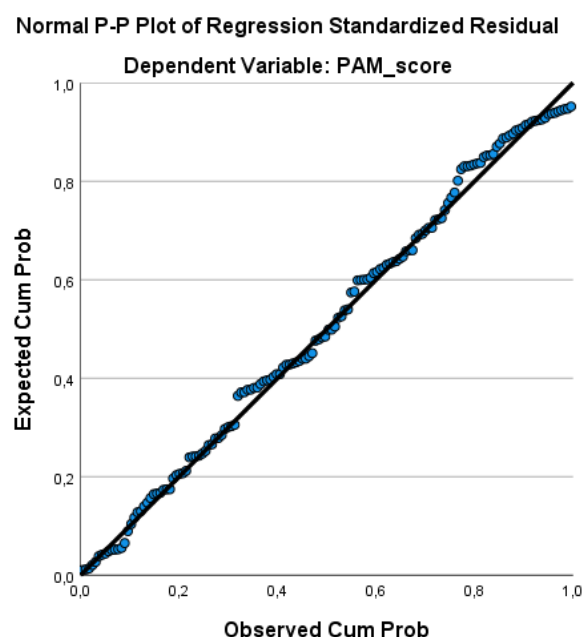

#### Results of the ordinal logistic regression analysis

|                                                                                               | B (SE)       | 95 % CI        | p      |
|-----------------------------------------------------------------------------------------------|--------------|----------------|--------|
| Age                                                                                           | -0.32 (0.02) | -0.08 to -0.02 | 0.239  |
| Gender                                                                                        | -0.17 (0.37) | -0.92 to 0.56  | 0.637  |
| Did your primary physician ask you about your preferences in your treatment?                  | 0.27 (0.39)  | -0.49 to 1.04  | 0.484  |
| Have you agreed on treatment goals with your primary physician?                               | 0.63 (0.39)  | -0.14 to 1.47  | 0.111  |
| <i>Do you feel as involved in decisions about your treatment as you would like to be?*</i>    | 0.89 (0.41)  | 0.08 to 1.70   | 0.030* |
| Have you been offered participation in a patient training programme after your diagnosis?     | 0.44 (0.46)  | -0.47 to 1.35  | 0.347  |
| Have you been offered the opportunity to participate in a support group after your diagnosis? | -0.71 (0.66) | -2.03 to 0.59  | 0.283  |

|                                                                                                          |              |                |        |
|----------------------------------------------------------------------------------------------------------|--------------|----------------|--------|
| <i>Have you received a written (self-management) plan about what you can do to improve your health?*</i> | -1.21 (0.48) | -2.16 to -0.25 | 0.013* |
| Do you have a medication plan?                                                                           | 1.36 (0.73)  | -0.07 to 2.80  | 0.062  |
| In your opinion is this medication plan up-to-date?                                                      | -1.23 (0.63) | -2.47 to 0.00  | 0.051  |
| Has your primary physician reviewed your medication with you in the last 12 months?                      | 0.42 (0.44)  | -0.44 to 1.30  | 0.340  |
| Has your primary physician explained to you how and when you should take the medication?                 | -0.81 (0.53) | -1.86 to 0.23  | 0.127  |
| Has your primary physician discussed with you how you cope with the burden of the chronic disease?       | -0.69 (0.44) | -1.56 to 0.17  | 0.116  |

Note: \* significant associations with patient activation level
